# Supplementary material for: A simple recycling and reuse hydrothermal route to ZnO nanorod arrays, nanoribbon bundles, nanosheets, nanocubes and nanoparticles
Source: Royal Society of Chemistry journal article supplement (doi:10.1039/b900391f), 2009-01-01
Supplement: b900391f.pdf [file b900391f.pdf]

**Supporting Information for**  
**A simple recycling and reusing hydrothermal route to ZnO nanorod arrays,  
nanoribbon bundles, nanosheets, nanocubes and nanoparticles**

**Peng Gao,<sup>†,\*</sup> Yujin Chen,<sup>†</sup> Ying Wang,<sup>†</sup> Qin Zhang,<sup>†</sup> Xuefei Li<sup>†</sup> and Min Hu<sup>†</sup>**

*Key Laboratory of Superlight Materials and Surface Technology, Ministry of Education,  
Harbin Engineering University, Harbin, Heilongjiang 150001, P. R. China*

RECEIVED DATE (automatically inserted by publisher); Email: gaopeng@hrbeu.edu.cn

| Sample         | Scan size ( $\mu\text{m}^2$ ) | RMS Roughness (nm) | Average height (nm) |
|----------------|-------------------------------|--------------------|---------------------|
| Nanorod arrays | 4.0 $\times$ 4.0              | 64.84              | 121.8               |

**Table S1.** AFM measured parameters for nanorod product.

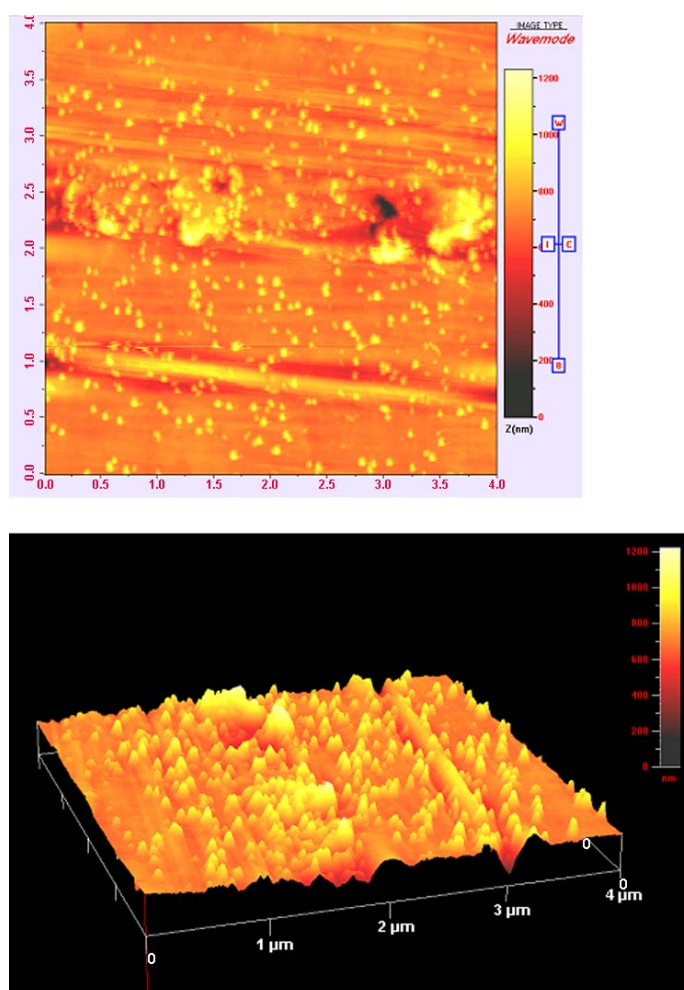

**Figure S1.** AFM imaging of nanorod arrays grown from obtained at 80 °C for 2 h.

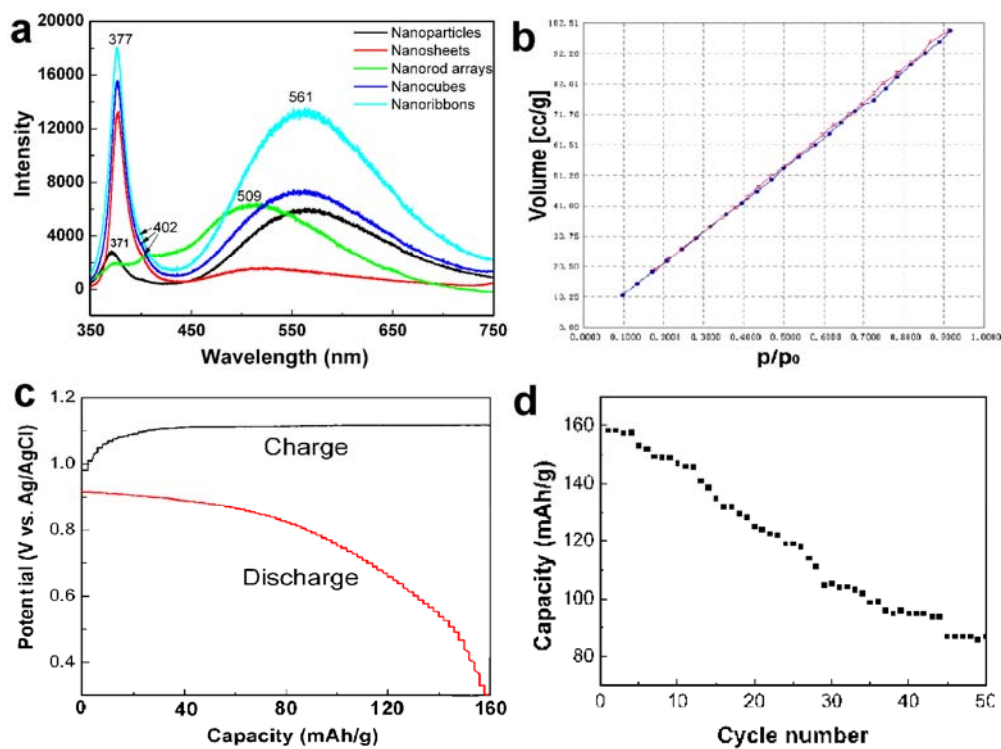

**Figure S2.** (a) PL spectra of the as-prepared ZnO nanostructures. (b)  $N_2$  adsorption-desorption isotherm of the as-obtained ZnO nanorod arrays. (c) Charge-discharge curves of ZnO nanorod arrays at a constant current density of 30 mA/g. (d) Cycle life of the as-synthesized ZnO nanorod electrode.
